# Supplementary material
Source: Springer Nature journal article supplement (https://www.springermedizin.de/resource/supplementary/12884_2014_1179_MOESM16_ESM.pdf/9459124)

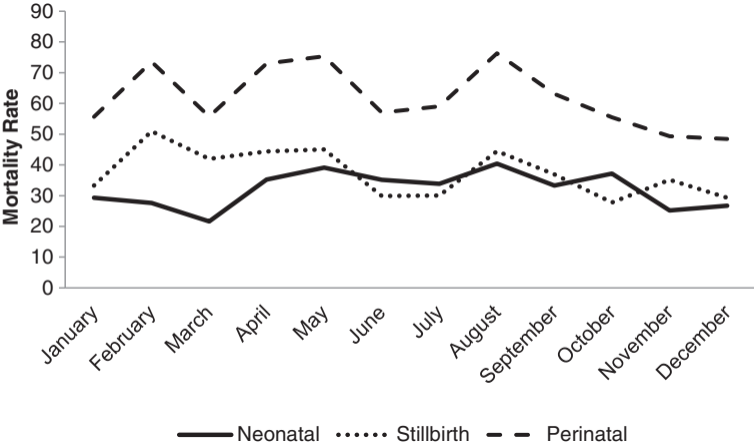

Supplement: MOESM16 [file 9459124]
